# Supplementary material for: One Single Tube Reaction of Aptasensor-Based Magnetic Sensing System for Selective Fluorescent Detection of VEGF in Plasma
Source: MDPI journal article supplement (doi:10.3390/bios13060574), 2023-05-24
Supplement: s1 [file s1]

Supporting Information

# One Single Tube Reaction of Aptasensor-Based Magnetic Sensing System for Selective Fluorescent Detection of VEGF in Plasma

Hwang-Shang Kou <sup>1</sup>, Shao-Tsung Lo <sup>1</sup> and Chun-Chi Wang <sup>1,2,3,\*</sup>

<sup>1</sup> School of Pharmacy, College of Pharmacy, Kaohsiung Medical University, Kaohsiung, Taiwan

<sup>2</sup> Department of Medical Research, Kaohsiung Medical University Hospital, Kaohsiung, Taiwan

<sup>3</sup> Drug Development and Value Creation Research Center, Kaohsiung Medical University, Kaohsiung, Taiwan

\* Correspondence: chunchi0716@kmu.edu.tw; Tel.: +886-7-3121101 (ext. 2253); Fax: +886-7-3210683

**Table S1.** The VEGF concentrations in the plasma of the healthy and cancer populations [30].

| The Kind of Cancer | The Plasma VEGF of the “Healthy Individuals” | The Plasma VEGF of the “Cancer Patients” |
|--------------------|----------------------------------------------|------------------------------------------|
| Breast cancer      | 0.027 – 0.030 ng/mL                          | 0.037 – 0.310 ng/mL                      |
| Prostate cancer    | 0.032 – 0.730 ng/mL                          | 0.013 – 0.061 ng/mL                      |
| Colorectal cancer  | 0.019 – 0.211 ng/mL                          | 0.009 – 0.126 ng/mL                      |
| Other cancer       | 0.023 – 0.137 ng/mL                          | 0.009 – 0.026 ng/mL                      |

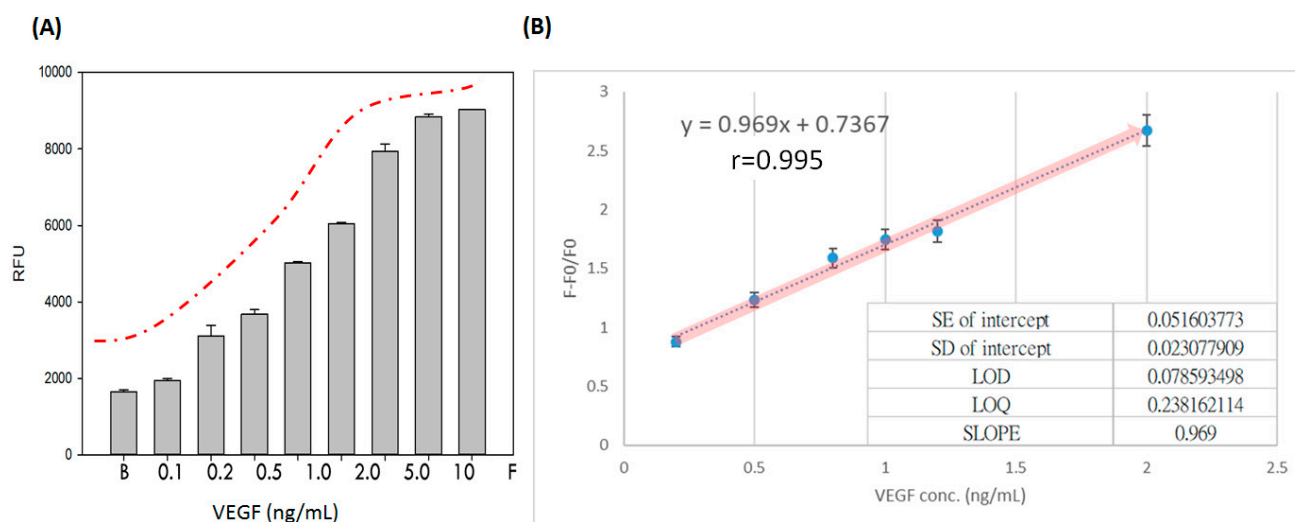

**Figure S1.** (A) The different concentrations of the VEGF versus the fluorescent intensities. (B) the calibration curve of VEGF by using  $F-F_0/F_0$  vs the concentration of VEGF from 0.2 to 2.0 ng/mL.
